# Supplementary material
Source: HighWire-hosted journal article supplement (https://rc.rcjournal.com/highwire/filestream/21606/field_highwire_adjunct_files/0/4._Spirometry_AARC_FINAL.pdf)
Supplement: 4._Spirometry_AARC_FINAL.pdf [file 4._Spirometry_AARC_FINAL.pdf]

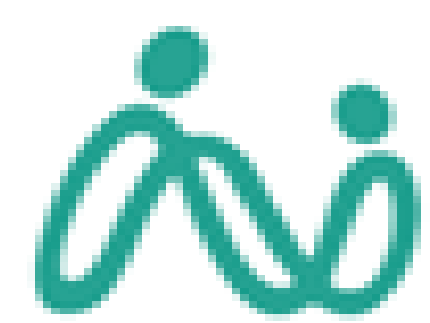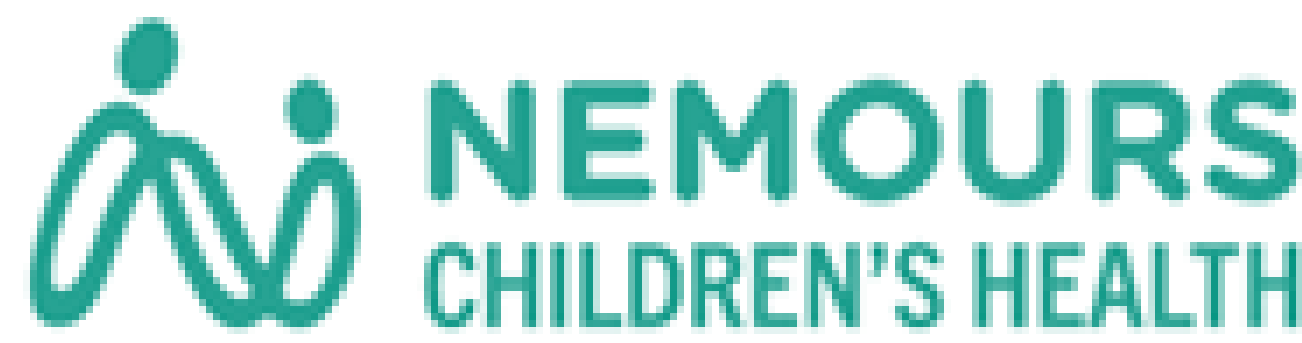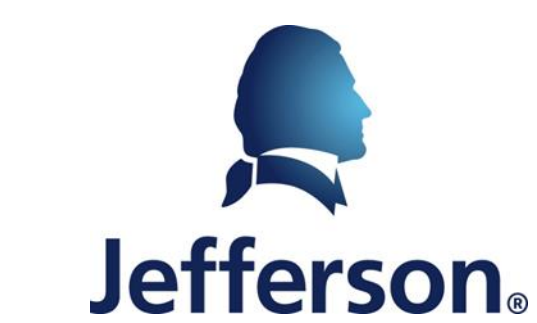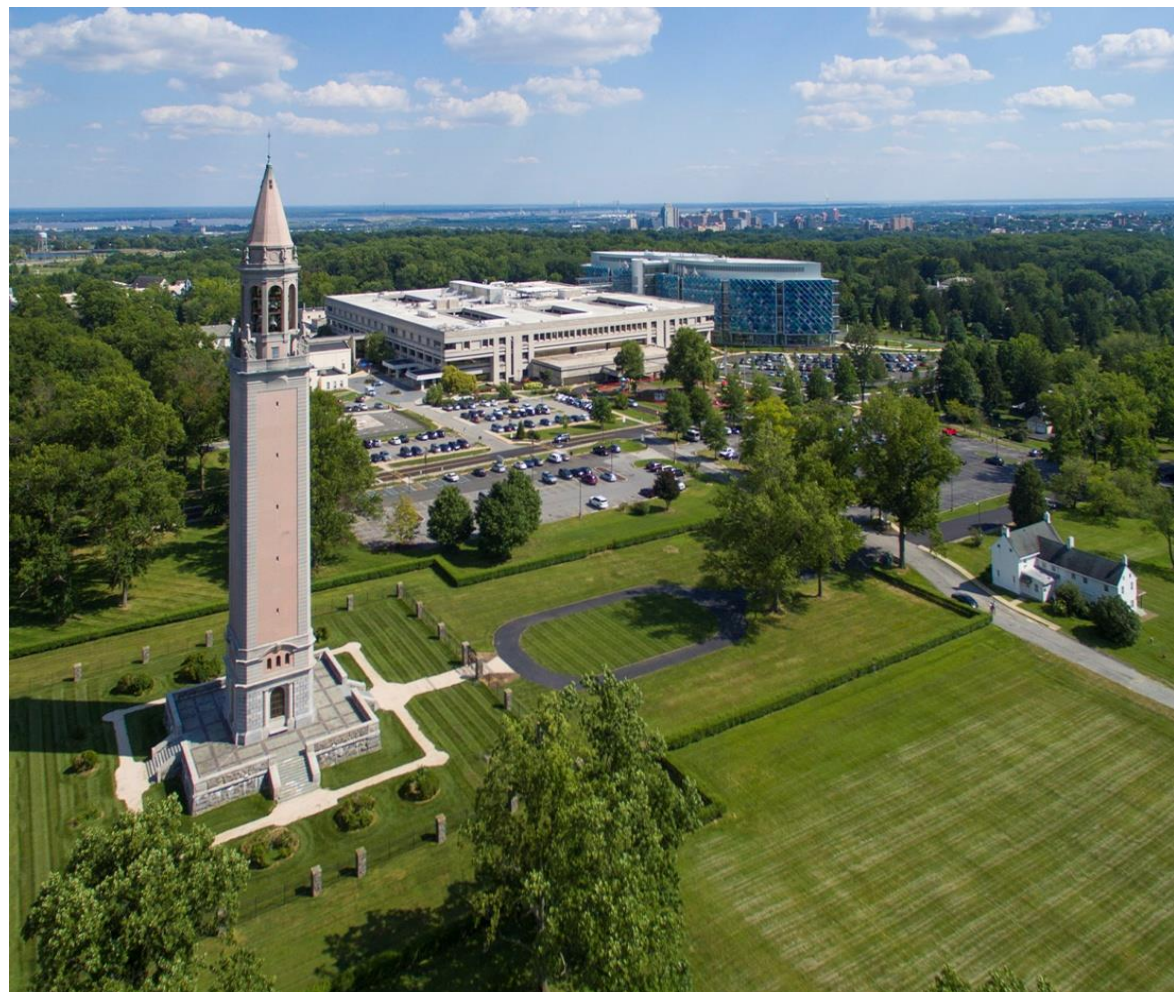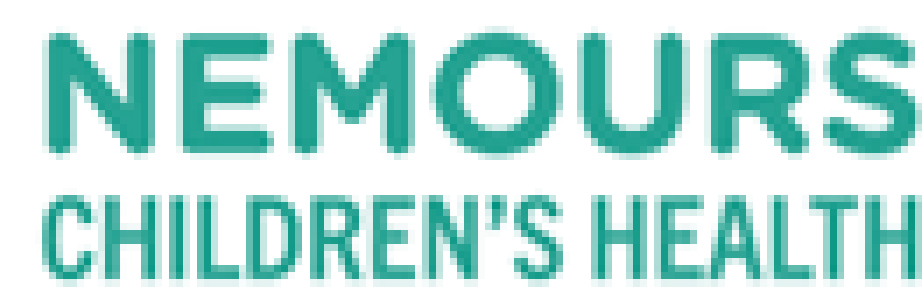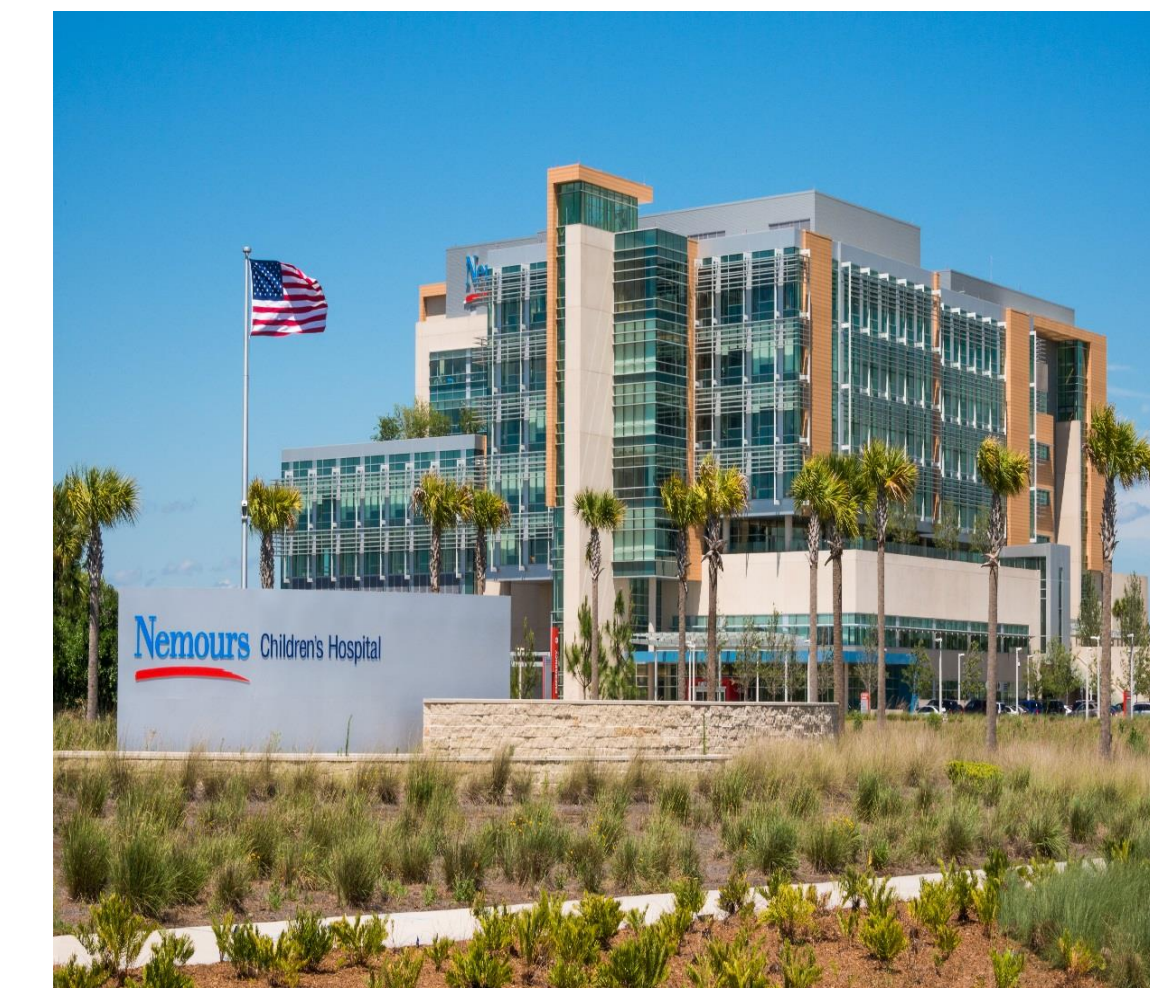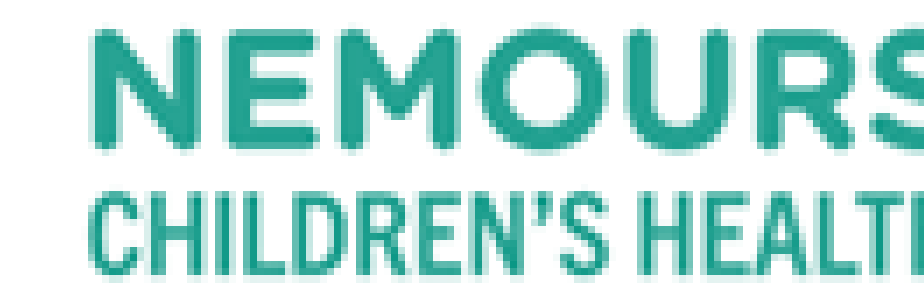

# EVALUATION OF OUTPATIENT PEDIATRIC SPIROMETRY AUDITS: RESPIRATORY THERAPISTS COMPLIANCE WITH ATS STANDARDS PRE & POST PFT CERTIFICATION

Melissa M. Kovaleski<sup>1</sup>, Katlyn L. Burr<sup>1</sup>, Jamie Markham<sup>1</sup>, Brenda Lemon<sup>1</sup>, Robert Heinle<sup>1,2</sup>

Respiratory Care Department<sup>1</sup>, Department of Pediatrics<sup>2</sup>, Nemours Children’s Health,  
Nemours Children’s Hospital- Delaware, Wilmington, DE, United States

Disclosures: Ms. Burr has a relationship with Hill-Rom, as a patient contract trainer, no other authors have relationships to report.

## Original Abstract

### EVALUATION OF OUTPATIENT PEDIATRIC SPIROMETRY AUDITS: RESPIRATORY THERAPISTS COMPLIANCE WITH ATS STANDARDS PRE & POST PFT CERTIFICATION

Melissa Kovaleski MBA RRT-NPS<sup>1</sup>, RPFT, CHFP, Katlyn L. Burr MSM RRT-NPS AE-C<sup>1</sup>, Jamie Markham RRT-NPS, RPFT<sup>1</sup>, Brenda Lemon RRT-NPS<sup>1</sup>, Robert Heinle MD<sup>1,2</sup>  
Respiratory Care, Nemours Alfred I. duPont Hospital for Children, Wilmington, DE  
Division of Pulmonology, Nemours Alfred I. duPont Hospital for Children, Wilmington, DE

**Background:** Our pediatric hospital utilizes 12 respiratory therapists (RTs) to preform spirometry studies in outpatient environments. The National Board of Respiratory Care (NBRC) offers the Pulmonary Function Technologist (PFT) credential for RTs to highlight specialized skills and excellence for those who obtain it. In our facility, five RTs were PFT certified (C/RPFT) prior to 2020 and seven RTs became PFT certified in 2020 (2 CPFT and 5 RPFT). The quality of spirometry is guided by the American Thoracic Society (ATS) standards to ensure that spirometry results are accurately interpreted and influence care appropriately. Audits pre and post PFT credential were reviewed for acceptability based on ATS Standards (table 1). We aimed to evaluate if PFT credentialing would translate into increased ATS compliance for spirometry performed in our pediatric hospital.

**Method:** In an IRB approved retrospective analysis, we reviewed and compared spirometry audits from 01/2019-05/2021 for compliance to ATS Standards. As part of our standard quality assurance process a minimum 30% of spirometry are randomly selected and audited by trained PFT staff for compliance based on ATS Standards.

**Results:** 670 spirometry audits were included for analysis for the seven RTs who obtained PFT credentials in 2020 (514 pre-credential and 156 post credential). Prior to PFT credential obtainment RTs preformed spirometry that met ATS standards 92.45% of the time. After obtaining PFT credential RTs performed spirometry that met ATS standards 97.72% of the time (Figure 1). This resulted in a 5.27% (p >0.05) increase in compliance with ATS standards post PFT credential obtainment.

**Conclusions:** In our pediatric health system, we found that spirometry compliance to ATS standards increased after RTs obtained their PFT credential. This translates into increased spirometry accuracy and could influence appropriate treatment. More research is needed to assess further implications from spirometry accuracy and the subsequent care provided.

**BACKROUND:** Our pediatric hospital utilizes 12 respiratory therapists (RTs) to preform spirometry studies in outpatient environments. The National Board of Respiratory Care (NBRC) offers the Pulmonary Function Technologist (PFT) credential for RTs to highlight specialized skills and excellence for those who obtain it. In our facility, five RTs were PFT certified (C/RPFT) prior to 2020 and seven RTs became PFT certified in 2020 (2 CPFT and 5 RPFT). The quality of spirometry is guided by the American Thoracic Society (ATS) standards to ensure that spirometry results are accurately interpreted and influence care appropriately. Audits pre and post PFT credential were reviewed for acceptability based on ATS Standards (table 1). We aimed to evaluate if PFT credentialing would translate into increased ATS compliance for spirometry performed in our pediatric hospital.

**METHOD:** In an IRB approved retrospective analysis, we reviewed and compared spirometry audits from 01/2019-05/2021 for compliance to ATS Standards. As part of our standard quality assurance process a minimum 30% of spirometry are randomly selected and audited by trained PFT staff for compliance based on ATS Standards.

Graph 1

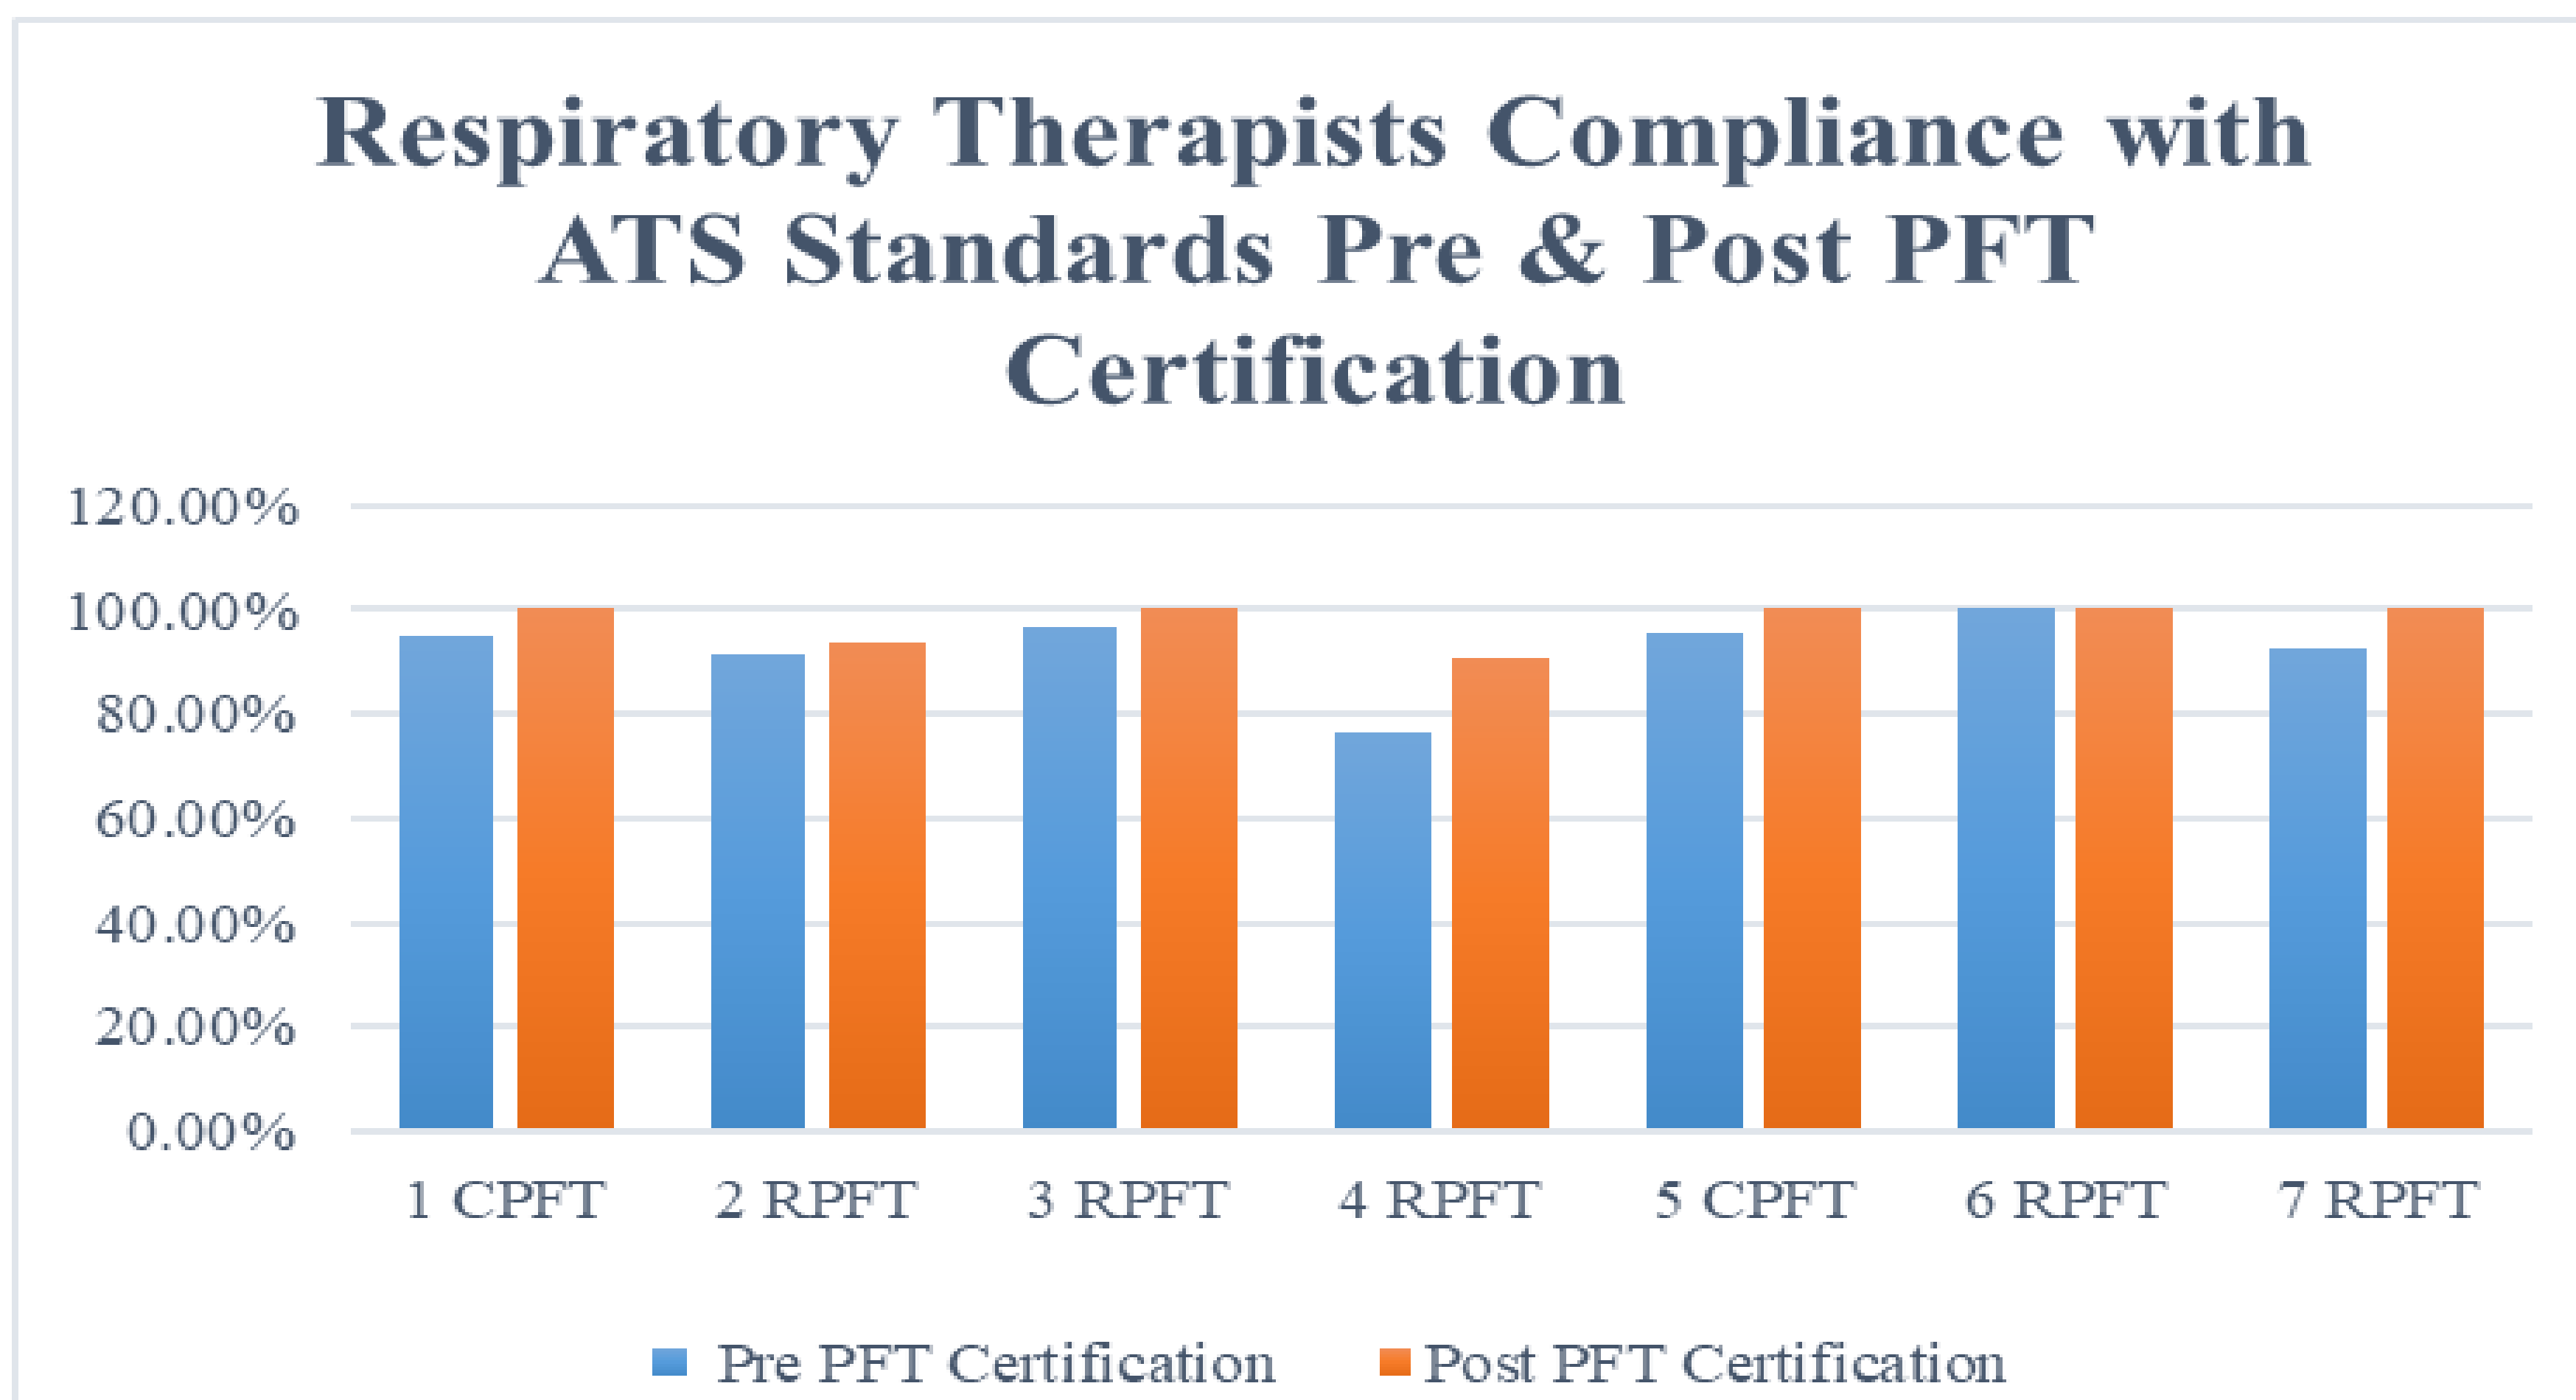

Graph 1 shows the individual percentage of compliance with ATS standards for pediatric spirometry in our facility based on Pre & Post PFT Certification.

**RESULTS:**670 spirometry audits were included for analysis for the seven RTs who obtained PFT credentials in 2020 (514 pre-credential and 156 post credential). Prior to PFT credential obtainment RTs preformed spirometry that met ATS standards 92.45% of the time. After obtaining PFT credential RTs performed spirometry that met ATS standards 97.72% of the time (Figure 1). This resulted in a 5.27% (p >0.05) increase in compliance with ATS standards post PFT credential obtainment.

**CONCLUSIONS:** In our pediatric health system, we found that spirometry compliance to ATS standards increased after RTs obtained their PFT credential. This translates into increased spirometry accuracy and could influence appropriate treatment. More research is needed to assess further implications from spirometry accuracy and the subsequent care provided.

Table 1

| ATS Criteria for an Acceptable Test |                                                                                                                                                                                                                                                                                                                                                                                                                                                                                                      |
|-------------------------------------|------------------------------------------------------------------------------------------------------------------------------------------------------------------------------------------------------------------------------------------------------------------------------------------------------------------------------------------------------------------------------------------------------------------------------------------------------------------------------------------------------|
| Satisfactory start of test:         | <div><input type="checkbox"/> Extrapolated volume &lt; 5% of the FVC or 0.150 whichever is greater</div> <div><input type="checkbox"/> For children 6 and younger extrapolated volume 12.5 % of FVC or 0.080L</div>                                                                                                                                                                                                                                                                                  |
| Satisfactory end of test:           | <div>Performs the test with a maximum inhalation, good start, and smooth continuous exhalation with maximum effort:</div> <div><input type="checkbox"/> No cough in the first second</div> <div><input type="checkbox"/> No Valsalva maneuver</div> <div><input type="checkbox"/> No hesitation during the test</div> <div><input type="checkbox"/> No leaks</div> <div><input type="checkbox"/> No obstructed mouthpiece</div> <div><input type="checkbox"/> Plateau in the volume time curve</div> |
| Acceptable & Repeatable:            | <div><input type="checkbox"/> Minimum of 3 similar loops</div> <div><input type="checkbox"/> Difference between the largest and the next largest FVC &amp; FEV1 ≤ .150L</div> <div><input type="checkbox"/> Patients with FVC &lt;1.0L the difference between the largest and the next largest FVC &amp; FEV1 ≤ 0.100L</div>                                                                                                                                                                         |

Table 1 displays the criteria that must be met during spirometry audits in order for the spirometry to be considered in compliance with ATS standards.

## References

- Loeb J, Blower W, Feldstein J, Koch B, Munlin A, Hardie W. Acceptability and repeatability of spirometry in children using updated ATS/ERS criteria. *Pediatr Pulmonol.* 2008;43(10):1020-1024. doi:10.1002/ppul.20908
- Pérez-Yarza E, Villa J, Cobos N, et al. Espirometría forzada en preescolares sanos bajo las recomendaciones de la ATS/ERS: estudio CANDELA [Forced spirometry in healthy preschool children]. *An Pediatr (Barc).* 2009;70(1):3-11. doi:10.1016/j.anpedi.2008.10.003
